# Supplementary material
Source: Springer Nature journal article supplement (https://www.springermedizin.de/resource/supplementary/12913_2009_1343_MOESM3_ESM.pdf/9527924)
Supplement: MOESM3 [file 9527924]

# PRISMS – Patient Report Informing Self-Management Support

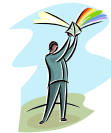

Please put a cross on the line to show how much of a problem each item is for you

|                                             | Not a problem | Big problem |
|---------------------------------------------|---------------|-------------|
| Being tired, no energy                      | ☺ _____ ☹     |             |
| Stress and worry                            | ☺ _____ ☹     |             |
| Shortness of breath                         | ☺ _____ ☹     |             |
| Pain                                        | ☺ _____ ☹     |             |
| Sleep problems                              | ☺ _____ ☹     |             |
| Managing to work                            | ☺ _____ ☹     |             |
| Support from family and friends             | ☺ _____ ☹     |             |
| Support from the NHS                        | ☺ _____ ☹     |             |
| Learning about your condition               | ☺ _____ ☹     |             |
| Being able to relax                         | ☺ _____ ☹     |             |
| Doing exercise                              | ☺ _____ ☹     |             |
| Getting out and doing things that you enjoy | ☺ _____ ☹     |             |
| Sexual problems                             | ☺ _____ ☹     |             |
| Healthy eating                              | ☺ _____ ☹     |             |
| Stopping smoking                            | ☺ _____ ☹     |             |
| Managing your medicines                     | ☺ _____ ☹     |             |
| Measuring your symptoms at home             | ☺ _____ ☹     |             |
| Any other problems?                         |               |             |

**Now, please put a cross beside the 3 items you feel that you need most help with**
